# Supplementary material
Source: Elsevier journal article supplement (https://www.sciencedirect.com/science/article/pii/S2529993X19301753)
Supplement: mmc1 [file S2529993X19301753:mmc1.pdf]

## **APÉNDICE**

### **Extracto de las respuestas al Derecho de Acceso a la Información Pública en lo relativo a la PrEP. Consultas realizadas sobre la existencia de un plan específico de prevención de VIH y actuaciones en materia de PrEP (julio a octubre de 2017):**

#### **Ministerio de Sanidad, Servicios Sociales e Igualdad**

1ª solicitud (julio de 2017):

“En relación a la Profilaxis Preexposición [PrEP] a la infección por el VIH, el Ministerio de Sanidad Servicios Sociales e Igualdad a través del Plan Nacional sobre el Sida está trabajando en tres líneas; la normativa, la técnica y de factibilidad, en colaboración con expertos de las Sociedades Científicas, representantes de las CCAA [CCAA] y de las Organizaciones no Gubernamentales. Puede acceder a información sobre la PrEP en el siguiente enlace: <http://www.msssi.gob.es/ciudadanos/enfLesiones/enfTransmisibles/sida/docs/infografiaProfilaxisPrEP.pdf>”.

2ª solicitud (julio de 2017):

“La Ley 19/2018, de 9 de diciembre, de Transparencia, acceso a la información pública y buen gobierno establece en su artículo 14.1, k) que el derecho de acceso a la información podrá ser limitado cuando acceder a la información suponga un perjuicio para “la garantía de la confidencialidad o el secreto requerido en procesos de toma de decisión”.

3ª solicitud (septiembre de 2017):

“En lo tocante al medicamento Truvada, la información solicitada es de acceso restringido al afectar a intereses económicos y comerciales de las compañías proveedoras y comercializadoras del mismo [artículo 14.1 h) LTBG”.

#### **Comunidad de Madrid**

“En relación a la pregunta de si se ha realizado alguna actuación en materia de profilaxis pre-exposición al VIH como método de prevención, se informa de que aún en España no está aprobada esta medicación antirretroviral para uso como Profilaxis Pre-exposición, por lo que no es una estrategia de prevención con la que podamos contar en estos momentos”.

#### **Andalucía**

1.-) La Consejería de Salud de la Junta de Andalucía ha participado en todos y cada uno de los estudios pilotos que el Plan Nacional de Sida ha solicitado en los últimos 5 años. Valgan como ejemplo el estudio piloto para la implementación de la prueba rutinaria del VIH en Atención Primaria (2015-2016) ó el desarrollo de la red de programas comunitarios de VIH (RedCo-VIH) actualmente en ejecución. Cada uno de estos estudios ha de incorporarse a la actividad rutinaria del SSPA. Son numerosos los estudios de esta y otras disciplinas que se llevan a cabo en los centros asistenciales por las y los profesionales del SAS. En el caso del estudio de factibilidad de

la implementación de la PrEP, requería de una logística, temporalidad y dedicación no compatible con otras acciones comprometidas.

2.-) La Consejería de Salud realiza una propuesta al MSSSI en la que se ofrecen alternativas al protocolo de estudio, para su adaptación a la organización de la atención sanitaria del SSPA, ya que de otra modo en Andalucía existen elementos inherentes al propio estudio propuesto y dificultades para su realización que son suficientes e importantes para llevarlo a cabo tal y como se propone manteniendo el mismo objetivo de conocer la factibilidad de la implementación de la PrEP. Esta propuesta no es aceptada por el MSSSI.

3.-) Además, la Consejería de Salud advierte en el estudio propuesto de al menos conflictos a tener en cuenta desde la perspectiva de la Bioética:

- El protocolo del estudio no se compromete a mantener la dispensación y financiación de la medicación a las personas incluidas en el estudio, una vez finalizado este.

- Todo estudio requiere financiación. En el caso del estudio de factibilidad de la implementación de la PrEP, la financiación procede de un laboratorio farmacéutico con intereses económicos en la aprobación de esta estrategia.

Por todo ello, la Consejería de Salud de la Junta de Andalucía decide su no participación activa en este pilotaje, quedando a la espera de los resultados globales del estudio a nivel nacional y su posible extrapolación al contexto de nuestra CCAA”.

### **Navarra**

“Desde la Administración de la CFN no se ha llevado a cabo actuaciones relacionadas con la profilaxis pre-exposición al VIH, al considerar que la evidencia científica que sustenta su incorporación al arsenal de prevención es muy débil”.

### **Cataluña**

“En virtud de los objetivos marcados en el Pla d’Acció enfront del VIH i altres ITS 2016-2020, en relación a la reducción de la incidencia y el retraso diagnóstico a través de la incorporación de nuevas estrategias para la prevención del VIH y otras ITS, las actuaciones que en relación a la profilaxis preexposición se están realizando en la actualidad o están previstas en un futuro próximo en Cataluña son las siguientes:

- Pla estratègic de recerca i innovació en Salut 2016-2020 (PERIS): el gobierno catalán ha concedido ayudas a la investigación aplicada sobre el uso de la PrEP, en concreto al Programa PrEP-Ara: estudio piloto de implementación de PrEP en Cataluña con análisis de costes asociados. Este estudio cuenta con la participación del Hospital Germans Trias i Pujol, del Hospital de Bellvitge, del Hospital Vall d’Hebron y del Centro de Investigación en Economía y Salud de la Universidad Pompeu Fabra. Se realizará en el período 2017-2019.

- A la espera de la aprobación de su uso por parte de la Agencia Española del Medicamento, en los próximos meses Cataluña participará en el proyecto de implementación de esta estrategia que tendrá lugar en el estado español y que organiza el Ministerio de Sanidad. El Programa de prevención, control y atención al VIH, las ITS y las hepatitis víricas de la Secretaria de Salud Pública del Departament de Salut está participando activamente en la elaboración del protocolo

y en la financiación de este proyecto, que tendrá una duración de un año y en el que se evaluará la factibilidad de la implementación de la PrEP en el Sistema Nacional de Salud.

- Cataluña también está participando en el ensayo clínico internacional DISCOVER a través de la entidad Projecte dels NOMS. El objetivo de este estudio es comparar la eficacia de Descovy® (tenofovir alafenamida, TAF/emtricitabina) frente a Truvada® (tenofovir disoproxil fumarato, TDF/emtricitabina) como PrEP.”

### **Euskadi**

“El País Vasco tiene previsto participar en el estudio de “Evaluación de la factibilidad de la implementación de la PrEP, como estrategia de prevención de la infección por el VIH en población de alto riesgo en el sistema nacional de Salud”, coordinado por el Ministerio de Sanidad, Servicios Sociales e Igualdad.

En el caso de nuestra Comunidad, dicho estudio se encuentra en una fase preliminar, estando a la espera de una reunión con el Ministerio para comenzar a tratar la forma en que se va a articular nuestra participación.”

### **Comunidad Valenciana**

“En lo relativo a la información que se solicita sobre si se ha realizado alguna actuación concerniente a la Profilaxis Pre Exposición para el VIH (PrEP) comunicar en primer lugar que:

Es el Ministerio de Sanidad, Servicios Sociales e Igualdad a través de la Dirección General de Farmacia y Productos Sanitarios quien dispone de la prerrogativa para resolver sobre la financiación o no financiación pública de cada especialidad farmacéutica.

Actualmente la decisión de incorporar el producto farmacéutico autorizado (Truvada®) para PrEP por la Agencia Europea del Medicamento y por la Agencia Española de Medicamentos y Productos Sanitarios (AEMPS), como producto financiado no está resuelto, es decir, todavía no se ha incluido en la prestación farmacéutica (financiación a cargo del Sistema SNS) por parte del Ministerio.

Esta es la razón por la que la PrEP no se ha podido implementar, estando las CCAA a la espera de la decisión del Ministerio de Sanidad, Servicios Sociales e Igualdad.

En la Comunitat Valenciana se ha creado un grupo de trabajo, abril de 2017, que está elaborando la estrategia de implantación de la PrEP que se llevará en la Comunitat Valenciana una vez el Ministerio de Sanidad, Servicios Sociales e Igualdad apruebe su inclusión en la financiación a cargo del SNS.”

### **Principado de Asturias:**

“Respecto del tema de la profilaxis pre-exposición al VIH, se informa que en Asturias, de momento, no se está realizando ninguna actuación en este sentido”.

### **Castilla y León:**

“En cuanto a las actuaciones en materia de profilaxis preexposición (PrEP) en la Reunión del Plan Nacional de 23 de marzo se indicó la puesta en marcha del Protocolo del estudio de Factibilidad

de la implementación de la PrEP como estrategia de prevención de la Infección por el VIH en población de alto riesgo en el Sistema Nacional de Salud, que ha sido publicado, en el BOE de 14 de agosto de 2017 (Convenio de colaboración entre la Dirección General de Salud Pública, Calidad e Innovación del Ministerio de Sanidad, Servicios Sociales e Igualdad y Gilead Sciences, S.L.U., en el contexto del estudio sobre evaluación de la factibilidad de la implementación de la profilaxis preexposición (PrEP), como estrategia de prevención de la infección por el VIH en población de alto riesgo en el Sistema Nacional de Salud). Esta estrategia de prevención, debe de implementarse de forma conjunta en el territorio nacional, una vez obtenido los resultados del estudio puesto en marcha en dos CCAA”.

### **La Rioja**

“En este momento, en la CCAA de La Rioja, no se han iniciado acciones específicas en cuanto a Profilaxis Pre-Exposición, permaneciendo a la espera de las decisiones que se adopten desde el Ministerio de Sanidad, Servicios Sociales e Igualdad”.

### **Aragón**

“En Aragón no se ha llevado a cabo ninguna actuación en materia de Profilaxis Pre-Exposición al VIH como método de prevención”.

### **Castilla-La Mancha**

“En materia de profilaxis pre-exposición al VIH como método de prevención, desde la Dirección General de Salud Pública y Consumo nos comunican que el Ministerio de Sanidad en colaboración con las CCAA, está llevando a cabo un estudio observacional post-autorización para evaluar la eficacia y seguridad clínica de la profilaxis pre-exposición (PPE) frente al VIH-Sida. Es el SESCOG quien puede informar sobre el grado de aplicación de la PPE. Por lo que, de acuerdo con lo previsto en el artículo 32.2 de la Ley 4/2016, de 15 de diciembre, de Transparencia y Buen Gobierno de Castilla-La Mancha, en relación con el artículo 19.1 de la Ley 19/2013, de 9 de diciembre, de Transparencia, Acceso a la Información y Buen Gobierno, se procede a dar traslado de su solicitud al SERVICIO DE SALUD DE CASTILLA-LA MANCHA (SESCOG) al ser éste el sujeto/órgano competente, que habrá de decidir sobre el acceso a la información objeto de su solicitud.

### **Murcia**

“Informamos que: La Dirección General de Salud Pública y Adicciones de la Consejería de Salud de la Región de Murcia, tiene como marco de actuación, en materia de VIH/sida y otras Infecciones de Transmisión Sexual, el plan Multisectorial Nacional sobre VIH y Otras Infecciones de Transmisión Sexual. También en lo que se refiere a la profilaxis pre-exposición.”

### **Islas Baleares**

“(…) y que en cuanto a la profilaxis pre exposición no se están realizando acciones dirigidas al tratamiento”.

### **Islas Canarias**

“La PrEP es una intervención dirigida a prevenir la transmisión del VIH en personas seronegativas para el VIH con alto riesgo de contraer la infección. Consiste en el uso diario, de un medicamento antirretroviral antes de la exposición al virus (Truvada®), acompañado de una serie de medidas preventivas relacionadas con la promoción del uso del preservativo y de consejo asistido para la reducción de riesgos.

Debido a las características de la epidemia de VIH en nuestro país, se baraja dirigir la intervención de forma prioritaria a los gais y otros hombres que tienen sexo con hombres (HSH), y a las personas transexuales, con riesgo sustancial de infección por el

VIH, dado que el mayor porcentaje de nuevos diagnósticos en los últimos años se produjo en este grupo de población.

En la actualidad, y a la espera de su aprobación por parte del MSSSI, se ha procedido a realizar una consulta al Comité de Bioética de España por parte de la Dirección General de Salud Pública, Calidad e Innovación de la Secretaría General de Sanidad y Consumo del MSSSI en relación a los dilemas éticos derivados de la financiación pública de la PrEP. El Comité de Bioética de España emitió informe de respuesta el pasado 7 de marzo de 2017.

[http://assets.comitedebioetica.es/files/documentacion/es/Informe\\_PrEP.pdf](http://assets.comitedebioetica.es/files/documentacion/es/Informe_PrEP.pdf)

Por otra parte, en el caso de España, aunque el uso fue autorizado como PrEP por la Comisión Europea el 18 de agosto de 2017, el laboratorio fabricante no ha presentado la solicitud de comercialización en la Agencia Española del Medicamento y Productos Sanitarios.

En la Dirección General de Salud Pública del Servicio Canario de Salud, en donde se ubica la Coordinación Regional del Plan del Sida, se siguen las directrices del Plan Nacional de Sida del MSSSI que está a la espera de las decisiones que se tomen en el seno del Consejo Interterritorial de Salud en relación a este tema. Por otra parte, se mantienen reuniones con las ONG colaboradoras para hacer un seguimiento in situ y recabar información para estar permanentemente actualizados.

El acceso se efectuará mediante correo electrónico facilitado por el interesado en su solicitud”.

#### **Galicia, Cantabria y Extremadura**

No se ha recibido respuesta.
